# Tracking dynamic changes in Alzheimer's disease brain proteome reveals ageing-independent damage in *Drosophila*

5

Harry M. Scholes<sup>1,\*</sup>, Adam Cryar<sup>1,\*</sup>, Fiona Kerr<sup>2,3</sup>, David Sutherland<sup>1</sup>, Lee A. Gethings<sup>4</sup>,  
Johannes P. C. Vissers<sup>4</sup>, Jonathan G. Lees<sup>1,5</sup>, Christine A. Orengo<sup>1,#</sup>, Linda Partridge<sup>2,6,#</sup>,  
Konstantinos Thalassinos<sup>1,#</sup>

10 1 Institute of Structural and Molecular Biology, University College London, London, United  
Kingdom

2 Institute of Healthy Ageing, University College London, London, United Kingdom

3 Current address: Department of Biology and Biomedical Sciences, School of Health and  
Life Sciences, Glasgow Caledonian University, Glasgow, United Kingdom

15 4 Waters Corporation, Manchester, United Kingdom

5 Current address: Faculty of Health and Life Sciences, Oxford Brookes University, UK

6 Max Planck Institute for Biology of Ageing, Cologne, Germany

\* Joint first authors

# Corresponding authors

20

## Abstract

Alzheimer's disease (AD), the most prevalent form of dementia, is a progressive and devastating neurodegenerative condition for which there are no effective treatments. Understanding the molecular pathology of AD during disease progression may identify new ways to reduce neuronal damage. Here, we present a longitudinal study tracking dynamic proteomic alterations in the brains of an inducible *Drosophila melanogaster* model of AD containing the Arctic mutant A $\beta$ 42 gene. We identified 3093 proteins from diseased flies and age-matched healthy controls using label-free quantitative ion-mobility data independent analysis mass spectrometry. Of these, 228 proteins were significantly altered by A $\beta$ 42 accumulation independently of age, are enriched for AD-associated processes and have distinct hub and bottleneck properties in the brain protein interaction network. We also demonstrate widespread ageing-independent brain proteome dysregulation in response to A $\beta$ 42, which affects the expression of proteins that are important for brain function and may explain the neuronal damage observed in AD.

35

## Introduction

Alzheimer's disease (AD) is a progressive and devastating neurodegenerative disease that is the most prevalent form of dementia [1]. Symptoms initially present as episodic memory loss and subsequently develop into widespread cognitive impairment. Two brain lesions are pathological hallmarks of the disease: plaques and neurofibrillary tangles. Plaques are extracellular aggregates of amyloid beta ( $A\beta$ ) [2], whereas, neurofibrillary tangles are intraneuronal aggregates of hyperphosphorylated tau [3,4]. In addition to these hallmarks, the AD brain experiences many other changes, including metabolic and oxidative dysregulation [5,6], DNA damage [7], cell cycle re-entry [8], axon loss [9] and, eventually, neuronal death [6,10].

Despite a substantial research effort, no cure for AD has been found. Effective treatments are desperately needed to cope with the projected increase in the number of new cases as a result of longer life expectancy and an ageing population. Sporadic onset is the most common form of AD (SAD), for which age is the major risk factor, whereas, familial AD (FAD)—a less common (<1%), but more aggressive, form of the disease—has an early onset of pathology before the age of 65 [11]. Familial AD is caused by fully penetrant mutations in the  $A\beta$  precursor protein (APP) and two subunits—presenilin 1 and presenilin 2—of the  $\gamma$ -secretase complex that processes APP in the amyloidogenic pathway to produce  $A\beta$ . Whilst the exact disease mechanisms of AD are not yet fully understood, this has provided support for  $A\beta$  accumulation as a key player in its cause and progression [1].  $A\beta_{42}$ —a 42 amino acid variant of the peptide—is neurotoxic [12], necessary for plaque deposition [13] and sufficient for tangle formation [14]. The Arctic mutation in  $A\beta_{42}$  (Glu22Gly) [15] causes a particularly aggressive form of familial AD that is associated with an increased rate and volume of plaque deposition [16]. Genetic analyses of SAD, however, suggest a complex molecular pathology, in which alterations in neuro-inflammation, cholesterol metabolism and synaptic recycling pathways may also be required for  $A\beta_{42}$  to initiate the toxic cascade of events leading to tau pathology and neuronal damage in dementia.

Comparison of proteomic analyses of post-mortem human brains have further revealed an increase in metabolic processes and reduction in synaptic function in AD [17]. Oxidised proteins also accumulate at early stages in AD brain, probably as a result of mitochondrial ROS production [18], and redox proteomic approaches suggest that enzymes involved in glucose metabolism are oxidised in mild cognitive impairment and AD [19,20]. Moreover, phospho-proteomic approaches have revealed alterations in phosphorylation of glycolytic and metabolic enzymes, as well as in kinases that regulate phosphorylation of chaperones

such as HSP27 and crystallin alpha B [21]. Of note, however, there is little proteomic overlap between studies using post-mortem human brain tissue, which may reflect the low sample  
75 numbers available for such studies, differences in comorbidities between patients and confounding post-mortem procedures [17]. Although valuable, post-mortem studies also reflect the end-stage of disease and, therefore, do not facilitate measurement of dynamic alterations in proteins as AD progresses.

Animal models of AD, generated through transgenic over-expression of human APP or tau,  
80 provide an opportunity to track proteomic alterations at pre- and post-pathological stages, thus facilitating insight into the molecular mechanisms underlying disease development and revealing new targets for drugs to reduce AD progression. Analyses of transgenic mice models of AD have revealed some overlapping alterations in metabolic enzymes, kinases and chaperones with human AD brain [17]. Only one study, however, has tracked alterations  
85 in protein carbonylation over time, showing increases in oxidation of metabolic enzymes (alpha-enolase, ATP synthase  $\alpha$ -chain and pyruvate dehydrogenase E1) and regulatory molecules (14-3-3 and Pin1) in correlation with disease progression [22].

*Drosophila* models of AD have been generated and shown to develop progressive neurodegenerative phenotypes, such as reduced climbing ability, and shortened lifespan  
90 when human A $\beta$ 42 peptide is expressed exclusively in adult fly neurons [23]. Using this inducible system, and taking advantage of the short lifespan of the fly, we have performed a longitudinal study of the brain proteome to capture the effects of A $\beta$ 42-toxicity in the brain from the point of amyloid induction and across life. We identified 3093 proteins using label-free quantitative ion-mobility data independent analysis mass spectrometry (IM-DIA-MS)  
95 [24], 1854 of which were common to healthy and AD flies. In this set, we identified 228 proteins that are significantly altered in AD; although the proteome of AD flies was clearly segregated from healthy controls at all ages, suggesting that biochemical alterations induced by A $\beta$ 42 do not simply reflect accelerated ageing. Proteins altered in response to A $\beta$ 42 were enriched for AD processes and have statistically significant network properties in the brain  
100 protein interaction network. We also show that these proteins are likely to be bottlenecks for signalling in the network, suggesting that they comprise important proteins for normal brain function. Our data indicates that ageing-independent brain proteome dysregulation in AD alters essential brain processes resulting in the premature death of AD flies. Our data will be an invaluable resource to understand the dynamic properties of A $\beta$ 42 proteo-toxicity during  
105 AD progression, with future functional studies identifying potential therapeutic candidates to treat AD at pre- and post-symptomatic stages.

## Results

### Proteome analysis of healthy and AD brains

Using an inducible transgenic fly line expressing human Arctic mutant A $\beta$ 42 (TgAD) [23] (Fig 110 1A), we confirmed a previously observed [23] reduction in lifespan following A $\beta$ 42 induction prior to proteomic analyses (Fig 1B).

To understand how the brain is affected as A $\beta$ 42 toxicity progresses, fly brains were dissected from healthy and AD flies at 5, 19, 31 and 46 days, and 54 and 80 days for healthy 115 controls, and the proteome was analysed by label-free quantitative IM-DIA-MS (Fig 1C, Supplementary Data 1). 1854 proteins were identified in both healthy and AD flies from a total of 3093 proteins (Fig 1D), which is comparable with recent fly proteomics studies [25,26].

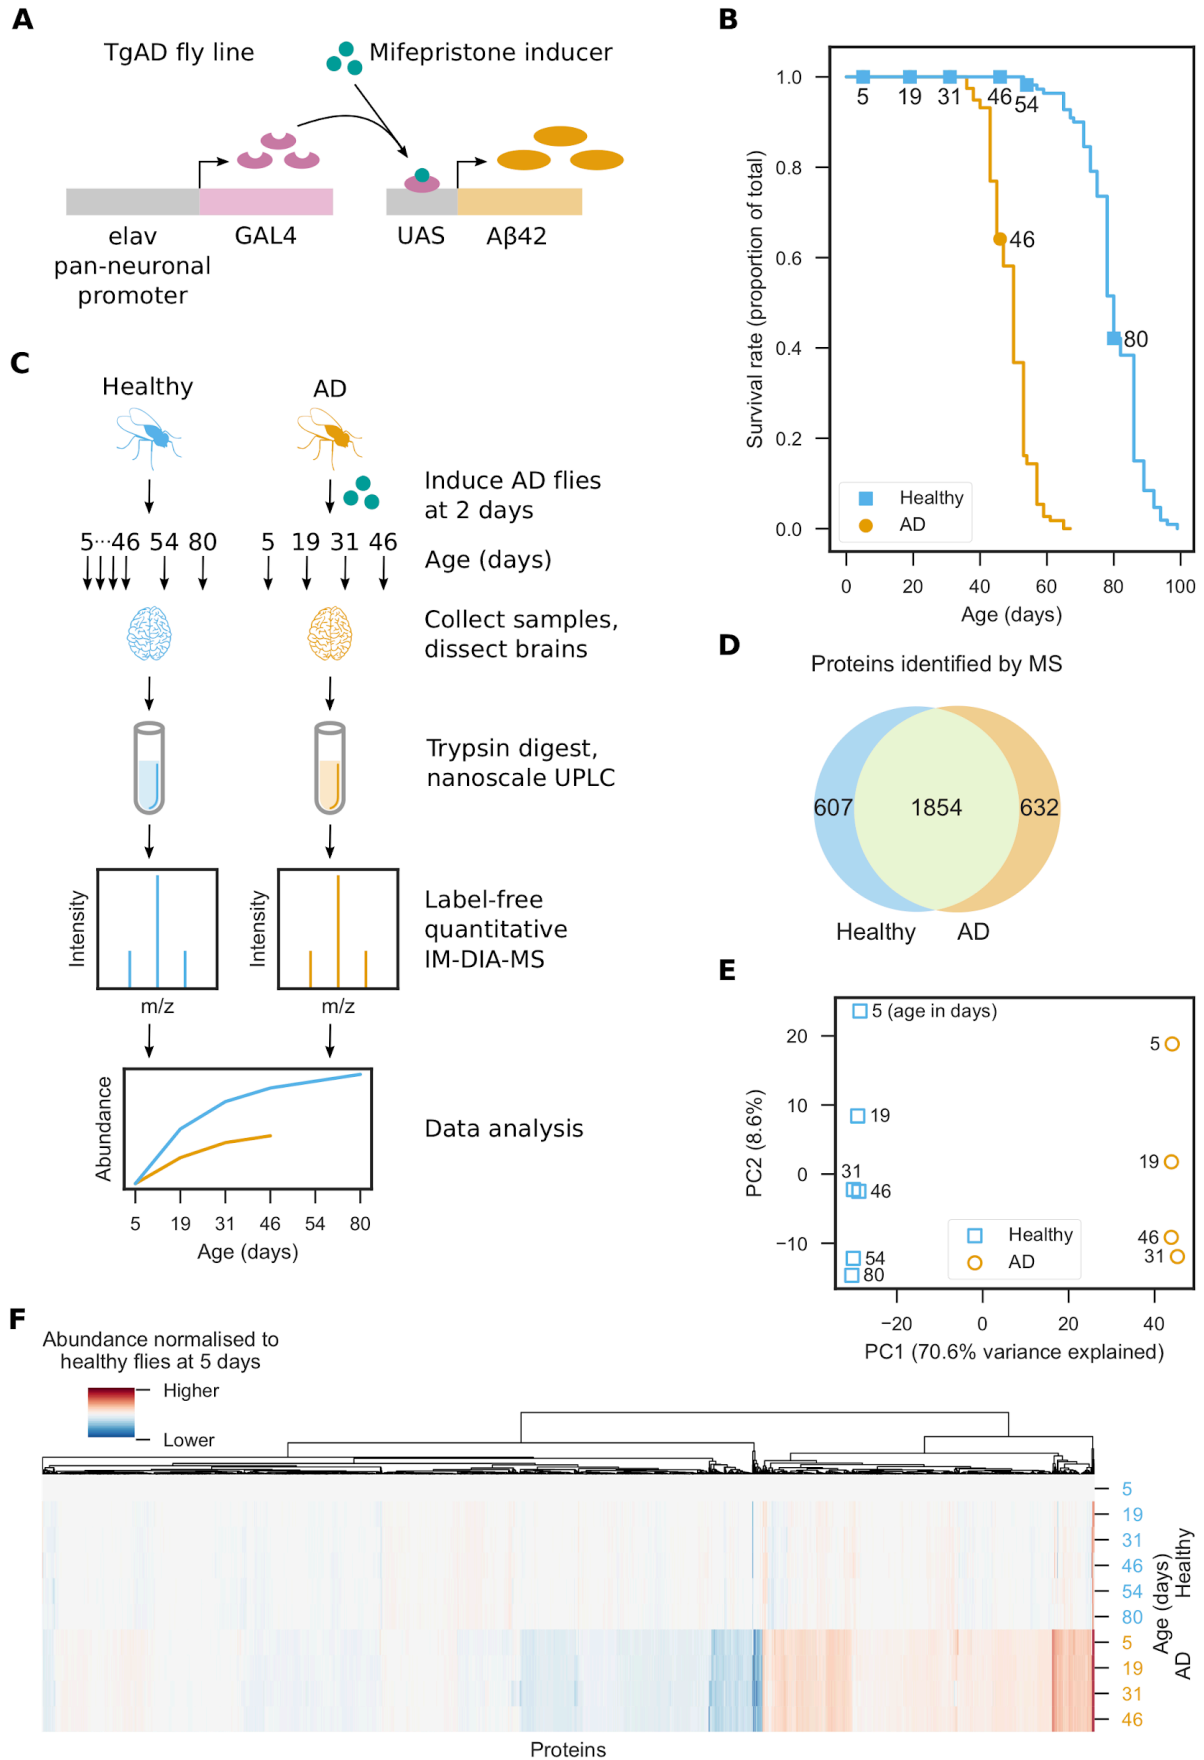

**Figure 1. Proteome analysis of healthy and AD brains. (A)** *Drosophila melanogaster* transgenic model of AD (TgAD) that expresses Arctic mutant A $\beta$ 42 in a mifepristone-inducible GAL4/UAS expression system under the pan-neuronal elav promoter. **(B)** Survival curves for healthy and AD flies. AD flies were induced to express A $\beta$ 42 at 2 days. Markers indicate days that MS samples were collected. **(C)** Experimental design of the brain proteome analysis. AD flies were induced to express A $\beta$ 42 at 2 days. For each of the three biological repeats, 10 healthy and 10 AD flies were collected at 5, 19, 31 and 46 days, as well as 54 and 80 days for healthy flies. Proteins were extracted from dissected brains and digested with trypsin. The resulting peptides were separated by nanoscale ultra performance liquid chromatography and analysed by label-free quantitative IM-DIA-MS. **(D)** Proteins identified by IM-DIA-MS. **(E)** Principal component analysis of the IM-DIA-MS data. Axes are annotated with the percentage of variance explained by each principal component. **(F)** Hierarchical biclustering using relative protein abundances normalised to their abundance in healthy flies at 5 days.

135 For the 1854 proteins identified in both healthy and AD flies, we assessed the reliability of  
our data. Proteins were highly correlated between technical and biological repeats (Fig S1).  
We used principal component analysis of the protein abundances to identify sources of  
variance (Fig 1E). Healthy and AD samples are clearly separated in the first principal  
component, due to the effects of A $\beta$ 42 in AD flies. In the second principal component,  
140 samples are separated by increasing age, due to age-dependent changes in the proteome.  
These results show that whilst ageing does contribute to changes in the brain proteome  
(8.7% of the total variance), much larger changes are seen in AD (70.6%). Furthermore this  
suggests that A $\beta$ 42 toxicity does not simply reflect 'accelerated ageing', but instead operates  
via distinct pathways to the ageing process. We confirmed this result using hierarchical  
145 biclustering of protein abundances in A $\beta$ 42 versus healthy flies at 5 days (Fig 1F). The heat  
map reveals that, in healthy flies, most proteins do not vary significantly in abundance.  
Conversely, many proteins are differentially abundant in AD flies, compared with healthy  
flies.

## Brain proteome dysregulation in AD

150 With the knowledge that A $\beta$ 42 expression affects the abundances of proteins in the brain,  
we then further identified proteins that were significantly altered in AD. To do this, we used  
five methods commonly used to analyse time course RNA-Seq data [27] and classified  
proteins as significantly altered if at least two methods detected them [28]. We identified 228  
significantly altered proteins from 740 proteins that were detected by one or more methods  
155 (Fig 2A). A comparison of popular RNA-Seq analysis tools [29] showed that edgeR [30] has  
a high false positive rate and variable performance on different data sets, whereas, DESeq2  
[31] and limma [32] have low false positive rates and perform more consistently. We saw a  
similar trend in our data set. limma and DESeq2 detected the lowest number of proteins,  
with 21 proteins in common (Fig S2A). edgeR detected more proteins, of which 38 were also  
160 detected by DESeq2 and 16 by limma. EDGE [33] and maSigPro [34] detected vastly more  
proteins, 464 of which were only detected by one method. Principal component analysis  
shows that edgeR, DESeq2 and limma detect similar proteins, whereas, EDGE and  
maSigPro detect very different proteins (Fig S2B).



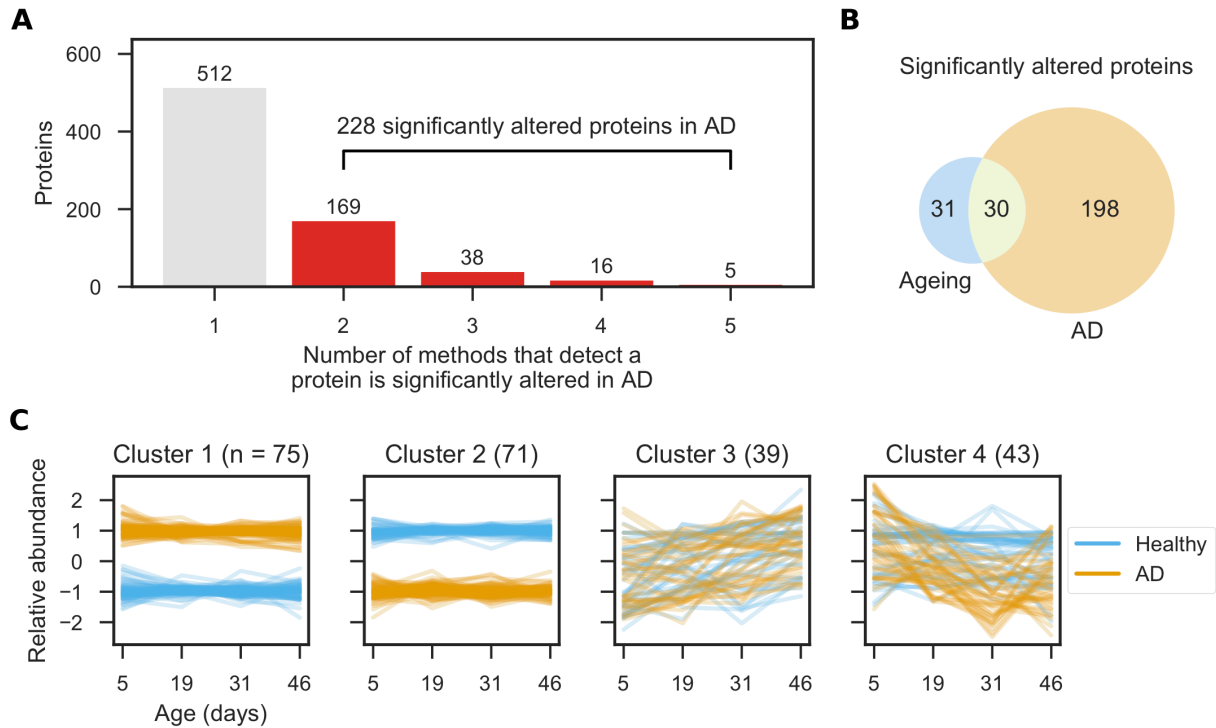

165 **Figure 2. Brain proteome dysregulation in AD.** (A) Proteins significantly altered in AD  
were identified using five methods (EDGE, edgeR, DESeq2, limma and maSigPro) and  
classified as significantly altered if at least two methods detected them. (B) Significantly  
altered proteins in AD (from A) and ageing. (C) Significantly altered protein abundances  
were z score-transformed and clustered using a Gaussian mixture model.

170

Although these methods should be able to differentiate between proteins that are altered in TgAD flies from those that change during normal ageing, we confirmed this by analysing healthy flies separately. In total, 61 proteins were identified as significantly altered (Fig S3), of which 30 were identified as significantly altered in normal ageing and AD (Fig 2B), while  
175 31 proteins were only significantly altered in normal ageing. These proteins are not enriched for any pathways or functions. Based on our data, we see that the vast majority of proteins that are significantly altered in AD are not altered in normal ageing and that AD causes significant dysregulation of the brain proteome. This further suggests that AD and ageing affect the brain via distinct pathways.

180 Reduced insulin/IGF signalling is known to promote longevity in many organisms. A recent mass spectrometry proteomics study of fly brains that have lower insulin/IFG signalling identified a large number of significantly altered proteins [26], although very few of these overlap with the proteins that we found to be significantly altered in AD. At the 0.05 significance level, 29 proteins were in common, representing 15% of our 228 significantly  
185 altered proteins, but just 7% of their total number of significantly altered proteins. Within these 29 proteins were three subunits of the cytochrome c oxidase complex, myosin and acyl CoA synthetase—involved in fatty acid metabolism. The small overlap of significantly altered proteins between these two studies is not surprising, however, and highlights the diverse molecular, cellular and physiological effects that ageing, AD and other age-  
190 associated diseases can have.

To understand how the abundances of the significantly altered proteins change in AD, we clustered their profiles using a Gaussian mixture model (Fig 2C). The proteins clustered best into four sets (Fig S4). In comparison to healthy flies, cluster 1 contains proteins that have consistently higher abundance in AD. Conversely, cluster 2 contains proteins that have  
195 lower abundance in AD. The abundances of proteins from clusters 1 and 2 are affected from the onset of disease at day 5, and remain at similar levels as the disease progresses. Dysregulation of these proteins may initiate AD pathogenesis, or be involved in early stage progression. Proteins in cluster 3 follow a similar trend in healthy and AD flies and increase in abundance with age. However, cluster 4 proteins decrease in abundance as the disease  
200 progresses, whilst remaining steady in healthy flies. These proteins may be interesting therapeutic targets because there is a greater opportunity to intervene between disease onset and amyloid accumulation, and their abundance beginning to decrease.

We performed a statistical GO enrichment analysis on each cluster, but found no enrichment of terms. Furthermore, we also saw no enrichment when we analysed all 228 proteins  
205 together.

## Proteins significantly altered in AD have distinct network properties

Next, we analysed the 228 significantly altered proteins in the context of the brain protein interaction network to determine whether their network properties are significantly different to the other brain proteins. Using a subgraph of the STRING [35] network induced on the 3093 proteins identified by IM-DIA-MS, we calculated four graph theoretic network properties (Fig 3A) of the 183 significantly altered proteins contained in this network: *degree*, the number of edges that a node has; *shortest path*, the smallest node set that connect any two nodes; *largest connected component*, the largest node set for which all nodes have at least one edge to any of the other nodes; and *betweenness centrality*, the proportion of all the shortest paths in the network that a particular node lies on.

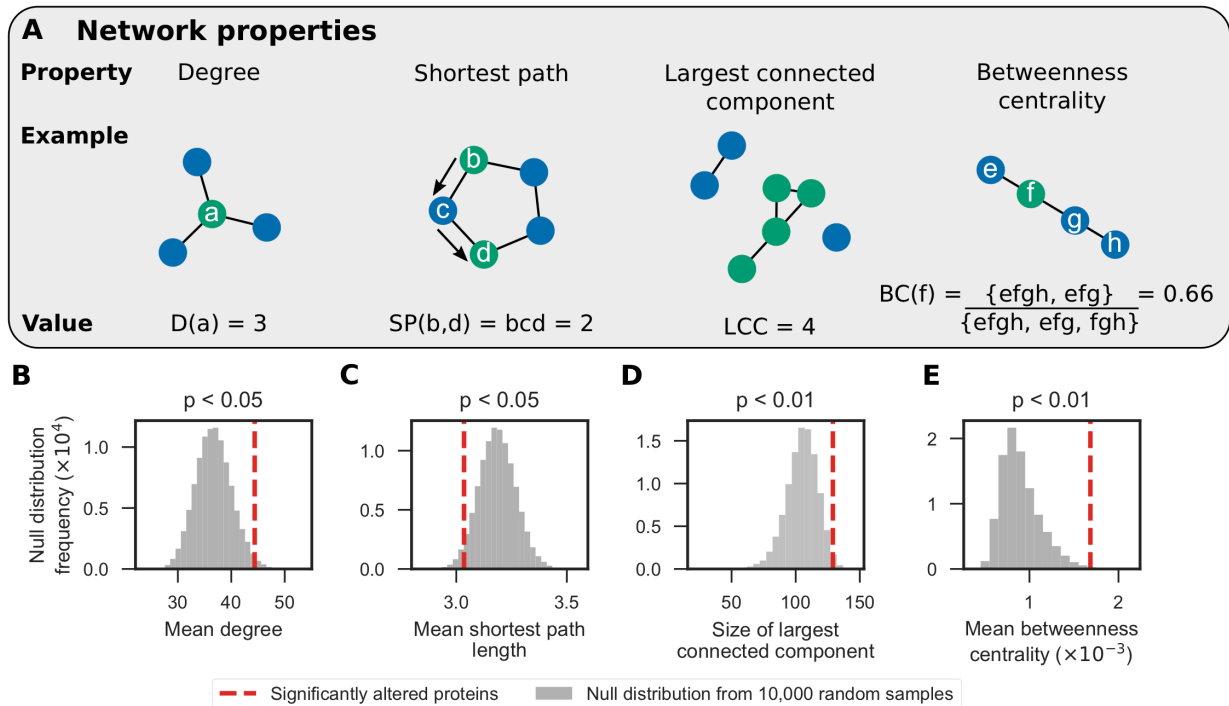

**Figure 3: Significantly altered proteins have statistically significant network properties in the brain protein interaction network.** (A) Network properties that were calculated: *degree*, the number of edges that a node has; *shortest path*, the smallest node set that connect any two nodes; *largest connected component*, the largest node set for which all nodes have at least one edge to any of the other nodes; and *betweenness centrality*, the proportion of all the shortest paths in the network that a particular node lies on. Using a subgraph of the STRING network induced on the 3093 proteins identified by IM-DIA-MS in healthy and AD flies, the significance of four network characteristics were calculated for the 183 significantly altered proteins contained in this subgraph. (B) mean degree; (C) mean shortest path length between a node and the remaining 182 nodes; (D) the size of the largest connected component in the subgraph induced on these nodes; and (E) mean betweenness centrality. Non-parametric p-values were calculated using null distributions of the test statistics, simulated by randomly sampling 183 nodes from the network 10,000 times.

We performed hypothesis tests and found that these proteins have statistically significant network properties. Firstly, the significantly altered proteins make more interactions than expected (mean degree  $p < 0.05$ ; Fig 3B). Therefore, these proteins may further imbalance the proteome by disrupting the expression or activity of proteins they interact with. Secondly, not only are these proteins close to each other (mean shortest path  $p < 0.05$ ; Fig 3C), but also 129 of them form a connected component (size of largest connected component  $p < 0.01$ ; Fig 3D). These two pieces of evidence suggest that AD disrupts proteins at the core of the proteome. Lastly, these proteins lie along shortest paths between many pairs of nodes (mean betweenness centrality  $p < 0.01$ ; Fig 3E) and may control how signals are transmitted in cells. Proteins with high betweenness centrality are also more likely to be essential genes for viability [36]. Taken together, these findings results strongly suggest that the proteins significantly altered in AD are important in the protein interaction network, and that dysregulation of these proteins may have significant consequences for the brain proteome and therefore function.

## Predicting the severity of AD-associated protein alterations using network properties

We predicted how severely particular AD-associated protein alterations may affect the brain using two network properties—the tendency of a node to be a hub or a bottleneck. In networks, nodes with high degree are hubs for communication, whereas, nodes with high betweenness centrality are bottlenecks that regulate how signals propagate through the network. Protein expression tends to be highly correlated to that of its neighbours in the protein interaction network. One exception to this rule, however, are bottleneck proteins, whose expression tends to be poorly correlated with that of its neighbours [36]. This suggests that the proteome is finely balanced and that the expression of bottleneck proteins is tightly regulated to maintain homeostasis. We analysed the hub and bottleneck properties of the significantly altered proteins and identified four hub-bottlenecks and five nonhub-bottlenecks that are involved in AD (Fig 4A) and analysed how their abundances change during normal ageing and over the course of the disease (Fig 4B).

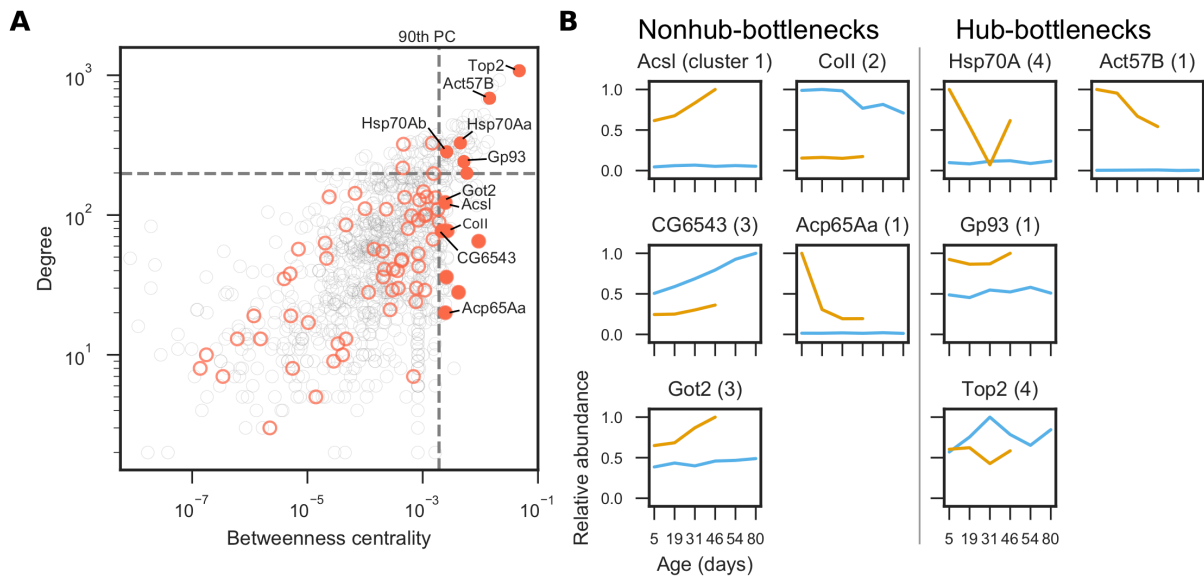

260

**Figure 4. Analysis of hubs and bottlenecks in the brain protein interaction network.** In networks, nodes with high degree are hubs and nodes with high betweenness centrality are bottlenecks. **(A)** Degree (hub-ness) is plotted against betweenness centrality (bottleneck-ness) in the brain protein interaction network for all proteins identified by IM-DIA-MS (grey circles). Of the significantly altered proteins (red circles), hub-bottleneck (> 90th percentile (PC) for degree and betweenness centrality) and nonhub-bottleneck proteins (> 90th PC for betweenness centrality) are highlighted (filled red circles). **(B)** Profiles of significantly altered bottleneck proteins implicated in AD. Maximum abundances are scaled to 1.

265

## Nonhub-bottlenecks: Acs1, CG6543, Got2, Coll and Acp65Aa

270 Three of the nonhub-bottlenecks are metabolic enzymes. Acs1 and CG6543 are involved in the production of acetyl-CoA from fatty acids. Acyl-CoA synthetase long chain (Acs1) catalyses the ligation of CoA to acyl chains and CG6543 hydrates double bonds in unsaturated fatty acids. AD is known to affect many enzymes involved in acetyl-CoA metabolism, causing an acetyl-CoA deficit in the brain and loss of cholinergic neurons [6].

275 Whilst CG6543 abundance increases in healthy flies during normal ageing—suggesting that aged flies require higher activity—its level was decreased in AD, which may have severe consequences. On the other hand, Acs1 is increased in AD. During development, Acs1 participates in neuronal development by directing the growth of axons.

Aspartate aminotransferase (Got2) produces the neurotransmitter L-glutamate from aspartate and is involved in assembly of synapses. After brain injury, aspartate aminotransferase levels become elevated [37], which may explain why Got2 is upregulated in AD.

In the mitochondrial electron transport chain, cytochrome c oxidase (COX)—also known as complex IV—uses the energy from reducing molecular oxygen to water to generate a proton gradient across the inner mitochondrial membrane. Coll—a COX subunit—is downregulated in AD flies. The link between COX and AD is unclear, although A $\beta$  is known to inhibit COX activity [38]. For example, in AD patients, COX activity—but not abundance—is reduced, resulting in increased levels of ROS [39]. However, in COX-deficient mouse models of AD, plaque deposition and oxidative damage are reduced [40]. Taken together, these results

285 suggest that whilst COX is clearly involved in AD, more work is required to decipher its role and how our results fit into this emerging picture.

The cuticle protein Acp65Aa was also upregulated in AD, but levels fell sharply between 5 and 19 days. However, it is surprising that we identified Acp65Aa in our samples, as it is not expected to be expressed in the brain. One explanation may involve chitin, which has been

295 detected in AD brains and has been suggested to facilitate A $\beta$  nucleation [41]. Amyloid aggregation has previously been shown to plateau around 15 days post-induction [42], which is around the same time that Acp65Aa drops in AD flies. Our results suggest that A $\beta$ 42 causes an increase in Acp65Aa expression early in the disease, but further experiments are needed to confirm this and whether AD flies have defective wings [43].

## 300 Hub-bottlenecks: Hsp70A, Gp93, Top2 and Act75B

Meanwhile, the four hub-bottlenecks indicate that the AD brain is stressed. Hsp70A, a heat shock protein that responds to hypoxia, is massively upregulated in AD—even after 5 days.

Hypoxia has been shown to promote A $\beta$  accumulation and tau hyperphosphorylation in the brain [44]. Additionally, we found Gp93—a stress response protein that binds unfolded  
305 proteins—to be twice as high in AD. DNA topoisomerase 2 (Top2), an essential enzyme for DNA double-strand break repair, is decreased in AD. Double-strand breaks occur naturally in the brain as a consequence of neuronal activity—an effect that is aggravated by A $\beta$  [7]. As a consequence of deficient DNA repair machinery, deleterious genetic lesions will accumulate in the brain and exacerbate neuronal loss.

310 Finally, we found that actin is increased in AD, in agreement with two recent studies on mice brains [45,46]. Recently, Kommaddi and colleagues found that A $\beta$  causes depolymerisation of F-actin filaments in a mouse AD model before onset of AD pathology [46]. The authors showed that although the concentration of monomeric G-actin increases, the total concentration of actin remains unchanged. It has long been known that G-, but not F-, actin  
315 is susceptible to cleavage by trypsin [47], permitting its detection and quantification by IM-DIA-MS. Hence, the apparent increase of actin in AD flies may be due to F-actin depolymerisation, which increases the pool of trypsin-digestible G-actin, and is consistent with the findings of Kommaddi *et al.* To confirm whether total actin levels remain the same in the brains of AD flies, additional experiments would have to be carried out in the future:  
320 tryptic digestion in the presence of MgADP—which makes F-actin susceptible to cleavage [48]—and transcriptomic analysis of actin mRNA. Furthermore, actin polymerisation is ATP-dependent, so increased levels of G-actin may indicate reduced intracellular ATP. In addition, ATP is important for correct protein folding and therefore reduced levels may lead to increased protein aggregation in AD.

325 Due to the importance of these hub and bottleneck proteins in the protein interaction network, we predict that AD-associated alterations in their abundance will likely have a significant effect on the cellular dynamics of the brain. We predict that rescuing these perturbations with drugs, or other therapeutics, would return these proteins to their normal abundance and therefore alleviate the effects and symptoms of AD. For example, the  
330 abundances of Acs1, Got2 and Gp93 increase as the disease progresses, so reducing their abundance should be neuroprotective. Conversely, increasing the expression of CG6543, Coll, or Top2, whose abundances are reduced in AD, should also be neuroprotective. Increasing or decreasing ACP64Aa, Act57B or Hsp70A could be neuroprotective, depending on the time of intervention, as toxicity may either be due to their elevated abundance in AD,  
335 or that their abundance falls as the disease progresses.



## Dysregulated genes are associated with known AD and ageing network modules

Finally, we clustered the protein interaction network into modules and performed a GO enrichment analysis on modules that contained any of the 228 significantly altered proteins. We saw no GO term enrichment when we tested these proteins clustered according to their abundance profiles (Fig 2C), presumably because the proteins affected in AD are diverse and involved in many different biological processes. However, by testing network modules for functional enrichment, we exploited the principle that interacting proteins are functionally associated. Using a subgraph of the STRING network containing the significantly altered proteins and their directly-interacting neighbours, we used MCODE [49] to find modules of densely interconnected nodes. We chose to include neighbouring proteins to compensate for proteins that may not have been detected in the MS experiments due to the stochastic nature of observing peptides and the wide dynamic range of biological samples [50]. The resulting subgraph contained 4842 proteins, including 183 of the 228 significantly altered proteins, as well as 477 proteins that were only identified in healthy or AD flies and 3125 proteins that were not identified in our IM-DIA-MS experiments. 12 modules were present in the network (Fig 5A, Supplementary Data 2). The proportion of these modules that were composed of significantly altered proteins ranged from 0–8%. All but one of the modules were enriched for processes implicated in AD and ageing (Fig 5, Supplementary Data 3), including respiration and oxidative phosphorylation; transcription and translation; proteolysis; DNA replication and repair; and cell cycle regulation. These modules contained two proteins that were recently found to be significantly altered in the brain of AD mice [45] and are both upregulated four-fold in AD: adenylate kinase, an adenine nucleotide phosphotransferase, and Arm, involved in creating long-term memories.

360

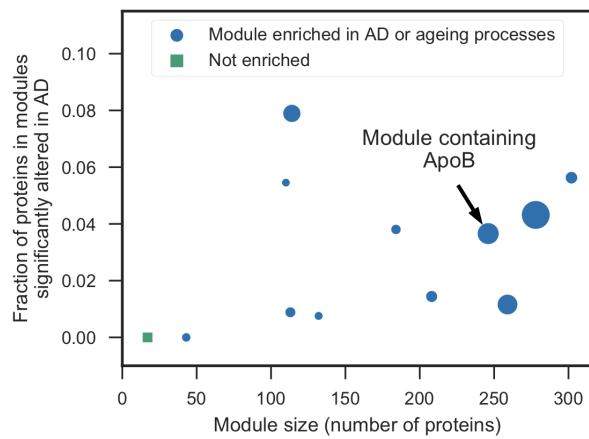

**Figure 5. Analysis of network modules enriched for AD or ageing processes.** MCODE was used to identify network modules in a subgraph of the STRING network containing the significantly altered proteins and their directly-interacting neighbours. The size of the resulting 12 modules is plotted against the fraction of proteins in these modules that are significantly altered in AD. Module 2 is annotated as containing ApoB. Marker sizes denote the MCODE score for the module.

365

370 In humans, the greatest genetic risk factor for AD is the  $\epsilon 4$  allele of ApoE—an apolipoprotein  
involved in cholesterol transport and repairing brain injuries [51]. A recent study showed that  
ApoE is only upregulated in regions of the mouse brain that have increased levels of A $\beta$  [45],  
indicating a direct link between the two proteins. Although flies lack a homolog of ApoE, they  
do possess a homolog of the related apolipoprotein ApoB (Apolpp) [52], which contributes to  
AD in mice [53,54] and is correlated with AD in humans [55,56]. Interestingly, whilst it was  
375 not identified by IM-DIA-MS, ApoB interacts with 12 significantly altered proteins in the  
STRING network, so is included in the subgraph induced on the significantly altered proteins  
and their neighbours. ApoB was found in the second highest scoring module that contains  
proteins involved in translation and glucose transport (Fig 5).

We analysed the 31 proteins significantly altered in normal ageing, but not AD. Of the 29  
380 proteins that were contained in the STRING network, 24 interact directly with at least one of  
the AD significantly altered proteins, suggesting an interplay between ageing and AD at the  
pathway level. Using a subgraph of the STRING network induced on these proteins and their  
1603 neighbours, we identified eight network modules that were enriched for ageing  
processes [57], including respiration; unfolded protein and oxidative damage stress  
385 responses; cell cycle regulation; DNA damage repair; and apoptosis.

## Discussion

Despite the substantial research effort spent on finding drugs against AD, so far, effective treatments—let alone a cure—remain elusive. Recently, however, there is renewed optimism following the discovery that plaque deposition can be prevented by a therapeutic antibody [58]. This work establishes ion-mobility-enabled, label-free quantitative proteomics as an effective method to track dynamic proteomic alterations, such as the widespread A $\beta$ 42-induced proteome dysregulation we observed in our *Drosophila* AD model.

Our analysis identifies many similarities between the processes that are affected by AD in both fly and human, demonstrating the relevance of our fly experimental system in future AD research, such as drug efficacy assays. Whilst there are slight differences in AD pathology between worm, fly and mouse model organisms, numerous studies have demonstrated high levels of conservations between these models, particularly with regard to age-related diseases. We believe that the ease of maintaining animal stocks, obtaining single-tissue brain samples and quantifying the proteome without the need for exogenous labels make our experimental system an excellent choice with which to study AD. Furthermore, *Drosophila* are a powerful and tractable model in which to test drug targets against a wide range of genetic backgrounds and mutants.

In conclusion, we performed a longitudinal study of the *Drosophila* brain proteome in AD and tracked the dynamic molecular A $\beta$ 42-induced alterations that occurred during progression of the disease by label-free quantitative IM-DIA-MS. We identified important proteins that are significantly altered in AD and enriched for a complex set of processes. By analysing these proteins in the context of protein interaction networks, we were able to untangle these processes and produce a more coherent picture of the disease. For example, we predicted that changes in the abundances of hub and bottleneck proteins will likely cause widespread dysregulation of the brain proteome. For correct neuronal function, homeostasis of the brain proteome must be maintained. As such, drugs that reduce the abundance of Acs11, Got2 or Gp93 may protect the brain against AD, as the abundance of these proteins increases as the disease progresses.

Our work demonstrates that by analysing these proteins, the associated processes can be untangled. In the future, our data set will be an invaluable resource to elucidate the mechanisms of A $\beta$ 42-induced pathology and can provide important insights into human AD.

## Materials and methods

### Fly stocks

420 The TgAD fly line used in this study [23] contains the human transgene encoding the Arctic mutant A $\beta$ 42 peptide [59]. Expression of A $\beta$ 42 was controlled by GeneSwitch [60]—a mifepristone-inducible GAL4/UAS expression system—under the pan-neuronal elav promoter.

425 Flies were grown in 200 ml bottles on a 12 h/12 h light/dark cycle at constant temperature (25 °C) and humidity. Growth media contained 15 g/l agar, 50 g/l sugar, 100 g/l autolysed yeast, 100 g/l nipagin and 3 ml/l propionic acid. Flies were grown for two days after eclosion before females were transferred to vials at a density of 25 flies per vial for the lifespan analysis and 10 flies per vial for the IM-DIA-MS analysis. Expression of A $\beta$ 42 was induced in AD flies by spiking the growth media with mifepristone to a final concentration of 200  $\mu$ M. Flies were transferred to fresh media three times per week, at which point the number of 430 surviving flies was recorded. For each of the three biological repeats, 10 healthy and 10 AD flies were collected at 5, 19, 31 and 46 days, as well as 54 and 80 days for healthy flies. Following anaesthetisation with CO<sub>2</sub>, brains were dissected in ice cold 10 mM phosphate buffered saline snap frozen and stored at -80°C.

### Extraction of brain proteins

435 Brain proteins were extracted by homogenisation on ice into 50  $\mu$ l of 50 mM ammonium bicarbonate, 10 mM DTT and 0.25% RapiGest detergent. Proteins were solubilised and disulfide bonds were reduced by heating at 80°C for 20 minutes. Free cysteine thiols were alkylated by adding 20 mM IAA and incubating at room temperature for 20 minutes in darkness. Protein concentration was determined and samples were diluted to a final 440 concentration of 0.1% RapiGest using 50 mM ammonium bicarbonate. Proteins were digested with trypsin overnight at 37°C at a 50:1 protein:trypsin ratio. Additional trypsin was added at a 100:1 ratio the following morning and incubated for a further hour. Detergent was removed by incubating at 60°C for 1 hour in 0.1% formic acid. Insoluble debris was removed by centrifugation at 14,000 x g for 30 minutes. Supernatant was collected, lyophilised and 445 stored at -80°C. Prior to lyophilisation peptide concentration was estimated by nanodrop (Thermo Fisher Scientific, Waltham, MA).

### Label-free quantitative IM-DIA-MS

Peptides were separated by UPLC by loading 300 ng of protein onto an analytical reversed

450 phase column. IM-DIA-MS analysis was performed using a Synapt G2-Si HDMS mass spectrometer (Waters Corporation, Manchester, UK). The time-of-flight analyzer of the mass spectrometer was externally calibrated with a NaCsl mixture from  $m/z$  50 to 1990. Spectra were acquired over a range of 50–2000  $m/z$ . Each biological repeat was analysed at least twice to account for technical variation.

455 Liquid chromatography MS data were peak detected and aligned by Progenesis QI for proteomics (Waters Corporation). The principles of the embedded search algorithm for DIA data has been described previously [61]. Proteins were identified by searching against the *Drosophila melanogaster* proteome in UniProt, appended with common contaminants, and reversed sequence entries to estimate protein identification false discovery rate (FDR) values, using previously specified search criteria [62]. Peptide intensities were normalised to control  
460 for variation in protein loading and relative quantification. Abundances were estimated by Hi3-based quantisation [63].

## Data analysis

Proteins that were identified in both healthy and AD flies were considered for further analysis. Missing data were replaced by the minimum abundance measured for any protein  
465 in the same repeat [50]. The data were quantile normalised [64], so that different conditions and time points could be compared reliably. Quantile normalisation transforms the abundances so that each repeat has the same distribution.

For PCA analysis, the data were  $\log_{10}$ -transformed and each protein was standardised to zero-mean and unit variance. Hierarchical biclustering was performed using the Euclidean  
470 distance metric with the complete linkage method. Prior to clustering, proteins were normalised to their abundance in healthy flies at 5 days.

Proteins that were identified by IM-DIA-MS in either healthy or AD flies were assessed for overrepresentation of GO terms using GOrilla [65], which uses ranked lists of target and background genes. Proteins were ranked in descending order by their mean abundance.  
475 The type I error rate was controlled by correcting for multiple testing using the Benjamini-Hochberg method at a FDR of 5%.

## Identification of significantly altered proteins

Significantly altered proteins were identified using five methods that are frequently used to identify differentially expressed genes in time course RNA-Seq data. DESeq2 [31], EDGE  
480 [33], edgeR [30], limma [32] and maSigPro [34] are all available in R through Bioconductor.

Dispersions were estimated from the biological and technical repeats. Unless otherwise stated, default parameters were used for all methods under the null hypothesis that a protein does not change in abundance between healthy and AD conditions in normal ageing. The type I error rate was controlled by correcting for multiple testing using the Benjamini-Hochberg method at a FDR of 5%. A protein was classified as significantly altered if two or more methods identified it.

DESeq2 models proteins with the negative binomial distribution and performs likelihood ratio tests. A time course experiment was selected in EDGE using the likelihood ratio test and a normal null distribution. edgeR uses the negative binomial distribution and performs quasi-likelihood tests. limma fits linear models to the proteins and performed empirical Bayes F-tests. maSigPro fits generalised linear models to the proteins and performs log-likelihood ratio tests.

Significantly altered proteins were clustered using a Gaussian mixture model. Protein abundances were log<sub>10</sub>-transformed and z scores were calculated. Gaussian mixture models were implemented for 1–228 clusters. The best model was chosen using the Bayesian information criterion (BIC), which penalises complex models:

$$\text{BIC} = -2\ln(L) + \ln(n)k$$

where  $\ln(L)$  is the log-likelihood of the model,  $n$  is the number of significantly altered proteins and  $k$  is the number of clusters. The model with lowest BIC was chosen.

## 500 Networks

All network analysis was performed using the *Drosophila melanogaster* STRING network (version 10) [35]. Low confidence interactions with a 'combined score' < 500 were removed in all network analyses.

Network properties of the significantly altered proteins were analysed in the brain protein interaction network. A subgraph of the STRING network was induced on the 3093 proteins identified by IM-DIA-MS in healthy or AD flies and the largest connected component was selected (2428 nodes and 44,561 edges). The subgraph contained 183 of the 228 significantly altered proteins. For these proteins, four network properties were calculated as test statistics: mean node degree; mean unweighted shortest path length between a node and the remaining 182 nodes; the size of the largest connected component in the subgraph induced on these nodes; and mean betweenness centrality. Hypothesis testing was performed using the null hypothesis that there is no difference between the nodes in the

subgraph. Assuming the null hypothesis is true, null distributions of each test statistic were simulated by randomly sampling 183 nodes from the network 10,000 times. Using the null  
515 distributions, non-parametric one-sided p-values were calculated as the probability of observing a test statistic as extreme as the test statistic for the significantly altered proteins.

A subgraph of the STRING network was induced on the proteins significantly altered in AD and their neighbours and the largest connected component was selected (4842 nodes and 182,474 edges). The subgraph contained 198 of the 228 significantly altered proteins and  
520 was assessed for enrichment of GO terms. Densely connected subgraphs were identified using MCODE [49]. Modules were selected with an MCODE score > 10. As STRING is a functional interaction network, clusters of nodes may correspond to proteins from the same complex, pathway or functional family. Clusters were assessed for overrepresentation of GO-Slim terms in the Biological Process ontology using Panther (version 13.1) [66] with a  
525 custom background of the 3093 proteins identified by IM-DIA-MS in healthy or AD flies. Fisher's exact tests were performed and the type I error rate was controlled by correcting for multiple testing using the Benjamini-Hochberg method at a FDR of 5%.

## Open source software

Data analysis was performed in Python 3.6 (Python Software Foundation,  
530 <http://www.python.org>) using SciPy [67], NumPy [68], Pandas [69], scikit-learn [70], NetworkX [71], IPython [72] and Jupyter [73]. Figures were plotted using Matplotlib [74] and seaborn.

## Acknowledgements

535 We thank Dr Damian Crowther (University of Cambridge) for donation of UAS-A $\beta$ 42 fly stocks and Dr Hervé Tricoire (CNRS, France) for donation of elavGS fly stocks. Fig 1C: fly graphic by Daan Kauwenberg and brain graphic by Julia Amadeo, both from the Noun Project.

## Funding

540 H.S. is supported by an ISMB Wellcome PhD studentship [203780/Z/16/A]; A.C. is supported by a BBSRC CASE PhD studentship and Waters Corporation; J.L. is supported



by BBSRC [BB/L002817/1]. The work was supported by a Wellcome instrumentation grant [104913/Z/14/Z].

## Competing interests

545 None

## Supplementary Information

### Methods

#### IM-DIA-MS analysis

550 Nanoscale ultra performance liquid chromatography (UPLC) separation of tryptic peptides was performed using a nanoAcquity UPLC system (Waters Corporation) equipped with a UPLC HSS T3 1.7  $\mu\text{m}$ , 75  $\mu\text{m}$  x 250 mm analytical reverse phase column (Waters Corporation). Prior to peptide separation, 300 ng of tryptic peptides were loaded onto a 2G, V/V 5  $\mu\text{m}$ , 180  $\mu\text{m}$  x 20 mm reverse phase trapping column at 5  $\mu\text{l}/\text{min}$  for 3 minutes. IM-  
555 DIA-MS analysis of tryptic digests was performed using a Synapt GS-Si HDMS mass spectrometer equipped with a T-Wave-IMS device. Mass measurements were made in positive-mode ESI with the instrument operated in resolution mode with a typical resolving power of 20,000 full width at half maximum. Prior to analysis the time-of-flight analyzer was externally calibrated with a NaCsl mixture from  $m/z$  50 to 1990. The data were post-  
560 acquisition lock mass corrected using the double charged monoisotopic ion of [Glu1]-Fibrinopeptide B. To achieve lock mass correction, a 100 fmol/ $\mu\text{l}$  solution of [Glu1]-Fibrinopeptide B was infused at a 90° angle to the analytical sprayer. This reference sprayer was sampled every 60 seconds. Accurate IM-DIA-MS data were collected in the DIA mode of analysis, HDMS<sup>E</sup> [24,62] IM spectrometry was performed by applying a constant wave  
565 height of 40 V whilst a constant wave velocity of 650 m/s was maintained. Wave heights within the trap and transfer were both set at 4 V whilst the wave velocities were 311 and 175 m/s respectively. MS data were acquired over 50-2000  $m/z$  for each mode. Spectral acquisition time for each mode was 0.5 s with a 0.015 interscan delay, corresponding to a cycle of low and elevated energy data being acquired every 1.1 s. During the low energy MS  
570 mode data was acquired whilst applying a constant collision energy of 4 eV within the transfer. After IMS, MS/MS data was acquired by ramping the collision energy within the transfer region between 15 and 45 eV. To ensure that ions with a  $m/z$  less than 350 were derived from peptide fragmentation within the transfer region the radio frequency applied to the quadrupole mass analyser was adjusted to optimise transmission within the region of  
575 350 – 2000 Da. Each biological replicate was analysed at least twice.

#### MS Data Processing

All MS data were processed in Progenesis QI for proteomics. Data were imported into Progenesis to generate a 3D representation of the data ( $m/z$ , RT and peak intensity). Samples were then time aligned with the software allowed to automatically determine the

580 best reference run from the dataset. Following alignment, peak picking was performed on  
MS level data. A peak picking sensitivity of 4 (out of 5) was set. Peptide features were  
tentatively aligned with their respective fragment ions based primarily on the similarity of  
their chromatographic and mobility profiles. Requirements for features to be included in post-  
585 processing database searching were as follows: 300 counts for low energy ions, 50 counts  
for high energy ions and 750 counts for deconvoluted precursor intensities. Subsequent data  
were searched against 20,049 sequences from the UniProt canonical *Drosophila* database  
(appended with common contaminants). Trypsin was specified as the enzyme of choice and  
a maximum of two missed cleavages were permitted. Carbamidomethyl (C) was set as a  
590 fixed modification whilst oxidation (M) and N-terminal acetylation were set as variable  
modifications. Peptide identifications were grouped and relative quantification was  
performed using non-conflicting peptides only.

## Data

### Supplementary Data 1

supplementary\_data\_1.xlsx

595 Proteomics data

### Supplementary Data 2

supplementary\_data\_2.txt

MCODE modules

### 600 Supplementary Data 3

supplementary\_data\_3.xlsx

GO enrichment

## Figures

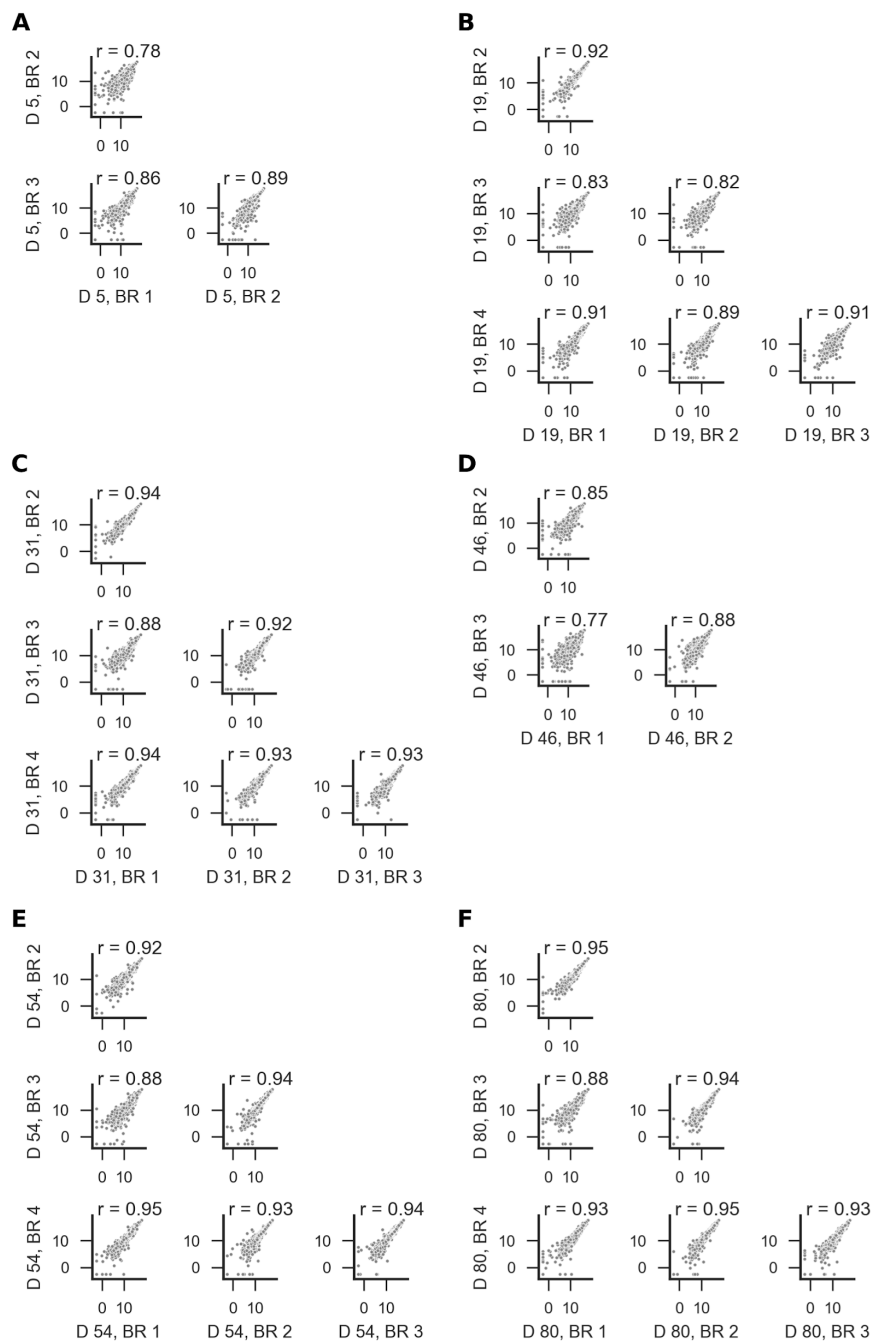

605

**Figure S1: Assessment of experimental reproducibility.** Scatter plots comparing protein abundances in different biological repeats (BR) of healthy flies at days (D) (A) 5, (B) 19, (C) 31, (D) 46, (E) 54 and (F) 80. Abundances were log<sub>2</sub>-transformed before plotting. Pearson correlation coefficients (r) are shown for each pair of biological repeat at each time point.

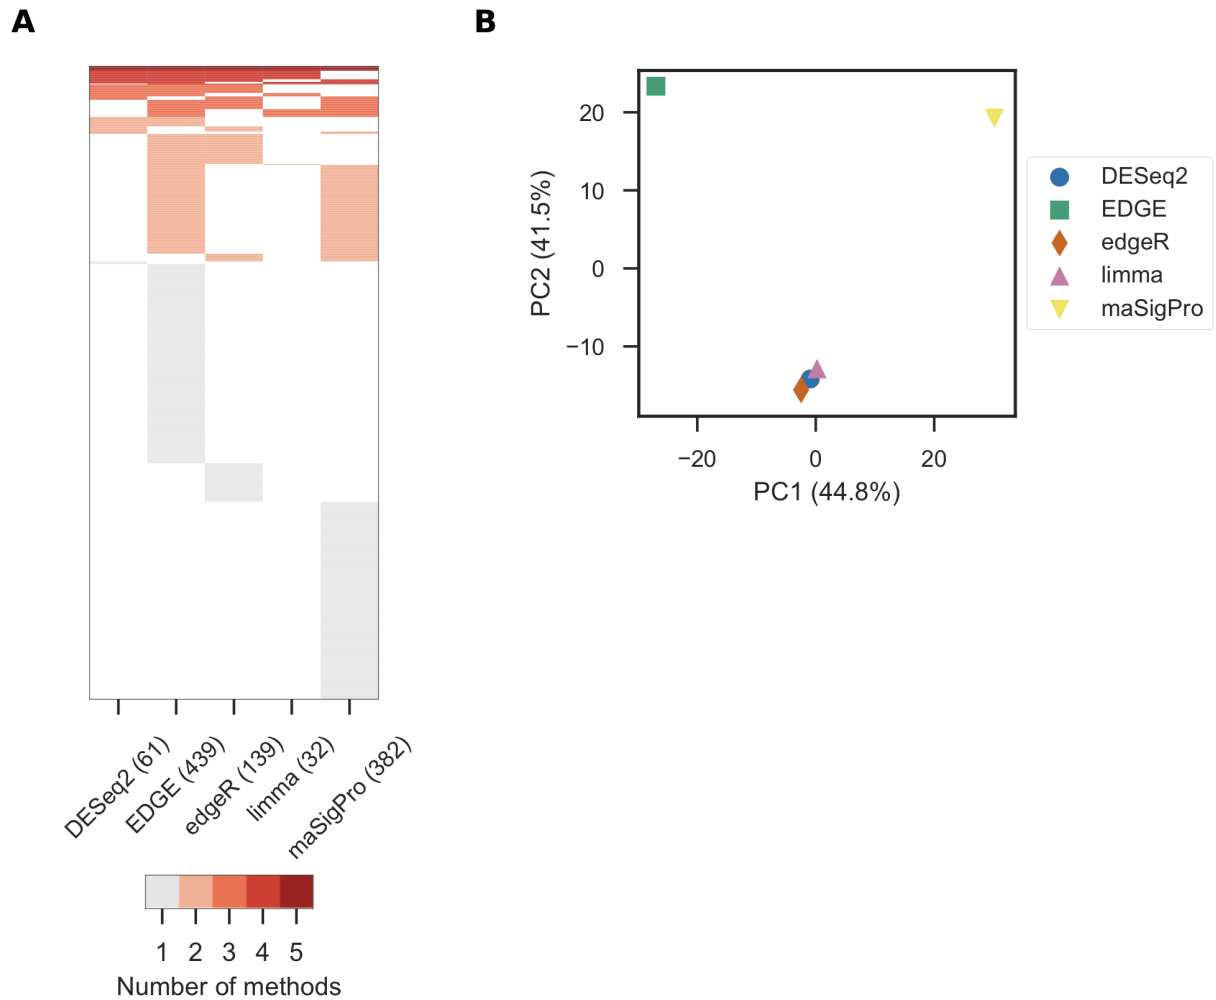

610

**Figure S2: Analysis of the five statistical methods used to identify significantly altered proteins.**

(A) Heat map of the proteins detected by each method. (B) Principal component analysis of these results. Axes are annotated with the percentage of variance explained by each principal component.

615

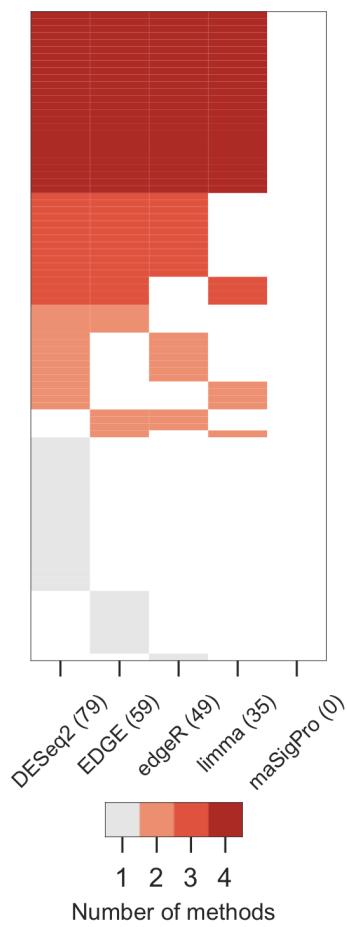

**Figure S3: Identification of significantly altered proteins during normal ageing.** Heat map of the proteins detected by each method.

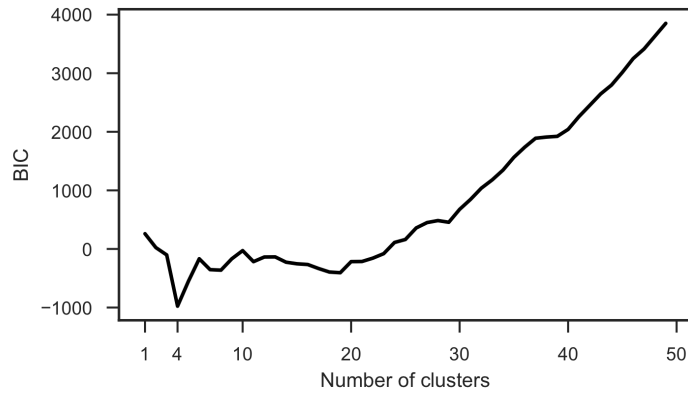

620 **Figure S4: Model selection for clustering of the significantly altered proteins using a Gaussian mixture model.** The best model was chosen using the Bayesian information criterion (BIC), which penalises complex models.

## References

- 625 1. Lane CA, Hardy J, Schott JM. Alzheimer's disease. *Eur J Neurol.* 2018;25: 59–70. doi:10.1111/ene.13439
2. Glenner GG, Wong CW. Alzheimer's disease: initial report of the purification and characterization of a novel cerebrovascular amyloid protein. 1984. *Biochem Biophys Res Commun.* 2012;425: 534–539. doi:10.1016/j.bbrc.2012.08.020
- 630 3. Grundke-Iqbal I, Iqbal K, Tung YC, Quinlan M, Wisniewski HM, Binder LI. Abnormal phosphorylation of the microtubule-associated protein tau (tau) in Alzheimer cytoskeletal pathology. *Proc Natl Acad Sci U S A.* 1986;83: 4913–4917. Available: <https://www.ncbi.nlm.nih.gov/pubmed/3088567>
- 635 4. Goedert M, Wischik CM, Crowther RA, Walker JE, Klug A. Cloning and sequencing of the cDNA encoding a core protein of the paired helical filament of Alzheimer disease: identification as the microtubule-associated protein tau. *Proc Natl Acad Sci U S A.* 1988;85: 4051–4055. Available: <https://www.ncbi.nlm.nih.gov/pubmed/3131773>
- 640 5. Cai H, Cong W-N, Ji S, Rothman S, Maudsley S, Martin B. Metabolic Dysfunction in Alzheimer's Disease and Related Neurodegenerative Disorders. *Curr Alzheimer Res.* 2011;9: 5–17. doi:10.2174/156720512799015064
6. Szutowicz A, Bielarczyk H, Jankowska-Kulawy A, Pawełczyk T, Ronowska A. Acetyl-CoA the key factor for survival or death of cholinergic neurons in course of neurodegenerative diseases. *Neurochem Res.* 2013;38: 1523–1542. doi:10.1007/s11064-013-1060-x
- 645 7. Suberbielle E, Sanchez PE, Kravitz AV, Wang X, Ho K, Eilertson K, et al. Physiologic brain activity causes DNA double-strand breaks in neurons, with exacerbation by amyloid- $\beta$ . *Nat Neurosci.* 2013;16: 613–621. doi:10.1038/nn.3356
- 650 8. Raina AK, Monteiro MJ, McShea A, Smith MA. The role of cell cycle-mediated events in Alzheimer's disease. *Int J Exp Pathol.* 1999;80: 71–76. doi:10.1046/j.1365-2613.1999.00106.x
9. Kanaan NM, Pigino GF, Brady ST, Lazarov O, Binder LI, Morfini GA. Axonal degeneration in Alzheimer's disease: when signaling abnormalities meet the axonal transport system. *Exp Neurol.* 2013;246: 44–53. doi:10.1016/j.expneurol.2012.06.003
- 655 10. Donev R, Kolev M, Millet B, Thome J. Neuronal death in Alzheimer's disease and therapeutic opportunities. *J Cell Mol Med.* 2009;13: 4329–4348. doi:10.1111/j.1582-4934.2009.00889.x
11. Van Cauwenberghe C, Van Broeckhoven C, Sleegers K. The genetic landscape of Alzheimer disease: clinical implications and perspectives. *Genet Med.* The Author(s); 2016;18: 421–430. doi:10.1038/gim.2015.117
- 660 12. Zhang Y, McLaughlin R, Goodyer C, LeBlanc A. Selective cytotoxicity of intracellular amyloid beta peptide1-42 through p53 and Bax in cultured primary human neurons. *J Cell Biol.* 2002;156: 519–529. doi:10.1083/jcb.200110119
- 665 13. McGowan E, Pickford F, Kim J, Onstead L, Eriksen J, Yu C, et al. Abeta42 is essential for parenchymal and vascular amyloid deposition in mice. *Neuron.* 2005;47: 191–199. doi:10.1016/j.neuron.2005.06.030



14. Götz J, Chen F, van Dorpe J, Nitsch RM. Formation of neurofibrillary tangles in P301 tau transgenic mice induced by Abeta 42 fibrils. *Science*. 2001;293: 1491–1495. doi:10.1126/science.1062097
- 670 15. Mullan M, Crawford F, Axelman K, Houlden H, Lilius L, Winblad B, et al. A pathogenic mutation for probable Alzheimer's disease in the APP gene at the N-terminus of beta-amyloid. *Nat Genet*. 1992;1: 345–347. doi:10.1038/ng0892-345
16. Nilsberth C, Westlind-Danielsson A, Eckman CB, Condron MM, Axelman K, Forsell C, et al. The "Arctic" APP mutation (E693G) causes Alzheimer's disease by enhanced Abeta protofibril formation. *Nat Neurosci*. 2001;4: 887–893. doi:10.1038/nn0901-887
- 675 17. Moya-Alvarado G, Gershoni-Emek N, Perlson E, Bronfman FC. Neurodegeneration and Alzheimer's disease (AD). What Can Proteomics Tell Us About the Alzheimer's Brain? *Mol Cell Proteomics*. 2016;15: 409–425. doi:10.1074/mcp.R115.053330
- 680 18. Lynn BC, Wang J, Markesbery WR, Lovell MA. Quantitative changes in the mitochondrial proteome from subjects with mild cognitive impairment, early stage, and late stage Alzheimer's disease. *J Alzheimers Dis*. 2010;19: 325–339. doi:10.3233/JAD-2010-1254
- 685 19. Butterfield DA, Di Domenico F, Swomley AM, Head E, Perluigi M. Redox proteomics analysis to decipher the neurobiology of Alzheimer-like neurodegeneration: overlaps in Down's syndrome and Alzheimer's disease brain. *Biochem J*. 2014;463: 177–189. doi:10.1042/BJ20140772
- 690 20. Aluise CD, Robinson RAS, Cai J, Pierce WM, Markesbery WR, Butterfield DA. Redox proteomics analysis of brains from subjects with amnesic mild cognitive impairment compared to brains from subjects with preclinical Alzheimer's disease: insights into memory loss in MCI. *J Alzheimers Dis*. 2011;23: 257–269. doi:10.3233/JAD-2010-101083
21. Dammer EB, Lee AK, Duong DM, Gearing M, Lah JJ, Levey AI, et al. Quantitative phosphoproteomics of Alzheimer's disease reveals cross-talk between kinases and small heat shock proteins. *Proteomics*. 2015;15: 508–519. doi:10.1002/pmic.201400189
- 695 22. Sultana R, Robinson RAS, Di Domenico F, Abdul HM, St Clair DK, Markesbery WR, et al. Proteomic identification of specifically carbonylated brain proteins in APP(NLh)/APP(NLh) × PS-1(P264L)/PS-1(P264L) human double mutant knock-in mice model of Alzheimer disease as a function of age. *J Proteomics*. 2011;74: 2430–2440. doi:10.1016/j.jprot.2011.06.015
- 700 23. Sofola O, Kerr F, Rogers I, Killick R, Augustin H, Gandy C, et al. Inhibition of GSK-3 Ameliorates Aβ Pathology in an Adult-Onset Drosophila Model of Alzheimer's Disease. Lu B, editor. *PLoS Genet*. Public Library of Science; 2010;6: e1001087. doi:10.1371/journal.pgen.1001087
- 705 24. Rodriguez-Suarez E, Hughes C, Gethings L, Giles K, Wildgoose J, Stapels M, et al. An Ion Mobility Assisted Data Independent LC-MS Strategy for the Analysis of Complex Biological Samples. *Curr Anal Chem*. 2013;9: 199–211. Available: <https://www.ingentaconnect.com/content/ben/cac/2013/00000009/00000002/art00006>
25. Brown CJ, Kaufman T, Trinidad JC, Clemmer DE. Proteome changes in the aging *Drosophila melanogaster* head. *Int J Mass Spectrom*. 2018;425: 36–46. doi:10.1016/j.ijms.2018.01.003

- 710 26. Tain LS, Sehlke R, Jain C, Chokkalingam M, Nagaraj N, Essers P, et al. A proteomic atlas of insulin signalling reveals tissue-specific mechanisms of longevity assurance. *Mol Syst Biol.* 2017;13: 939. doi:10.15252/msb.20177663
27. Anders S, McCarthy DJ, Chen Y, Okoniewski M, Smyth GK, Huber W, et al. Count-based differential expression analysis of RNA sequencing data using R and Bioconductor. *Nat Protoc.* 2013;8: 1765–1786. doi:10.1038/nprot.2013.099
- 715 28. Zhang ZH, Jhaveri DJ, Marshall VM, Bauer DC, Edson J, Narayanan RK, et al. A comparative study of techniques for differential expression analysis on RNA-Seq data. *PLoS One.* 2014;9: e103207. doi:10.1371/journal.pone.0103207
29. Seyednasrollah F, Laiho A, Elo LL. Comparison of software packages for detecting differential expression in RNA-seq studies. *Brief Bioinform.* 2015;16: 59–70. doi:10.1093/bib/bbt086
- 720 30. Robinson MD, McCarthy DJ, Smyth GK. edgeR: a Bioconductor package for differential expression analysis of digital gene expression data. *Bioinformatics.* 2010;26: 139–140. doi:10.1093/bioinformatics/btp616
- 725 31. Love MI, Huber W, Anders S. Moderated estimation of fold change and dispersion for RNA-seq data with DESeq2. *Genome Biol.* 2014;15: 550. doi:10.1186/s13059-014-0550-8
32. Ritchie ME, Phipson B, Wu D, Hu Y, Law CW, Shi W, et al. limma powers differential expression analyses for RNA-sequencing and microarray studies. *Nucleic Acids Res.* 2015;43: e47. doi:10.1093/nar/gkv007
- 730 33. Woo S, Leek JT, Storey JD. A computationally efficient modular optimal discovery procedure. *Bioinformatics.* 2011;27: 509–515. doi:10.1093/bioinformatics/btq701
34. Nueda MJ, Tarazona S, Conesa A. Next maSigPro: updating maSigPro bioconductor package for RNA-seq time series. *Bioinformatics.* 2014;30: 2598–2602. doi:10.1093/bioinformatics/btu333
- 735 35. Szklarczyk D, Morris JH, Cook H, Kuhn M, Wyder S, Simonovic M, et al. The STRING database in 2017: quality-controlled protein-protein association networks, made broadly accessible. *Nucleic Acids Res.* 2017;45: D362–D368. doi:10.1093/nar/gkw937
36. Yu H, Kim PM, Sprecher E, Trifonov V, Gerstein M. The importance of bottlenecks in protein networks: correlation with gene essentiality and expression dynamics. *PLoS Comput Biol.* 2007;3: e59. doi:10.1371/journal.pcbi.0030059
- 740 37. Maas AI. Cerebrospinal fluid enzymes in acute brain injury. 2. Relation of CSF enzyme activity to extent of brain injury. *J Neurol Neurosurg Psychiatry.* 1977;40: 666–674. doi:10.1136/jnnp.40.7.666
- 745 38. Casley CS, Canevari L, Land JM, Clark JB, Sharpe MA. Beta-amyloid inhibits integrated mitochondrial respiration and key enzyme activities. *J Neurochem.* 2002;80: 91–100. doi:10.1046/j.0022-3042.2001.00681.x
39. Cardoso SM, Proença MT, Santos S, Santana I, Oliveira CR. Cytochrome c oxidase is decreased in Alzheimer's disease platelets. *Neurobiol Aging.* 2004;25: 105–110. doi:10.1016/S0197-4580(03)00033-2
- 750 40. Fukui H, Diaz F, Garcia S, Moraes CT. Cytochrome c oxidase deficiency in neurons decreases both oxidative stress and amyloid formation in a mouse model of Alzheimer's

- disease. *Proc Natl Acad Sci U S A*. 2007;104: 14163–14168.  
doi:10.1073/pnas.0705738104
- 755 41. Castellani RJ, Siedlak SL, Fortino AE, Perry G, Ghetti B, Smith MA. Chitin-like polysaccharides in Alzheimer's disease brains. *Curr Alzheimer Res*. 2005;2: 419–423. Available: <https://www.ncbi.nlm.nih.gov/pubmed/16248847>
- 760 42. Rogers I, Kerr F, Martinez P, Hardy J, Lovestone S, Partridge L. Ageing Increases Vulnerability to A $\beta$ 2 Toxicity in *Drosophila*. Iijima KM, editor. *PLoS One*. 2012;7: e40569. doi:10.1371/journal.pone.0040569
43. Yagi Y, Tomita S, Nakamura M, Suzuki T. Overexpression of human amyloid precursor protein in *Drosophila*. *Mol Cell Biol Res Commun*. 2000;4: 43–49. doi:10.1006/mcbr.2000.0248
- 765 44. Zhang X, Le W. Pathological role of hypoxia in Alzheimer's disease. *Exp Neurol*. 2010;223: 299–303. doi:10.1016/j.expneurol.2009.07.033
45. Savas JN, Wang Y-Z, DeNardo LA, Martinez-Bartolome S, McClatchy DB, Hark TJ, et al. Amyloid Accumulation Drives Proteome-wide Alterations in Mouse Models of Alzheimer's Disease-like Pathology. *Cell Rep*. 2017;21: 2614–2627. doi:10.1016/j.celrep.2017.11.009
- 770 46. Kommaddi RP, Das D, Karunakaran S, Nanguneri S, Bapat D, Ray A, et al. A $\beta$  mediates F-actin disassembly in dendritic spines leading to cognitive deficits in Alzheimer's disease. *J Neurosci*. 2018;38: 1085–1099. doi:10.1523/JNEUROSCI.2127-17.2017
- 775 47. Jacobson GR, Rosenbusch JP. ATP binding to a protease-resistant core of actin. *Proc Natl Acad Sci U S A*. 1976;73: 2742–2746. Available: <https://www.ncbi.nlm.nih.gov/pubmed/134374>
48. Hozumi T. Structural aspects of skeletal muscle F-actin as studied by tryptic digestion: evidence for a second nucleotide interacting site. *J Biochem*. 1988;104: 285–288. Available: <https://www.ncbi.nlm.nih.gov/pubmed/2972700>
- 780 49. Bader GD, Hogue CWV. An automated method for finding molecular complexes in large protein interaction networks. *BMC Bioinformatics*. 2003;4: 2. doi:10.1186/1471-2105-4-2
50. Lazar C, Gatto L, Ferro M, Bruley C, Burger T. Accounting for the Multiple Natures of Missing Values in Label-Free Quantitative Proteomics Data Sets to Compare Imputation Strategies. *J Proteome Res*. 2016;15: 1116–1125. doi:10.1021/acs.jproteome.5b00981
- 785 51. Liu C-C, Liu C-C, Kanekiyo T, Xu H, Bu G. Apolipoprotein E and Alzheimer disease: risk, mechanisms and therapy. *Nat Rev Neurol*. 2013;9: 106–118. doi:10.1038/nrneurol.2012.263
- 790 52. Palm W, Sampaio JL, Brankatschk M, Carvalho M, Mahmoud A, Shevchenko A, et al. Lipoproteins in *Drosophila melanogaster*--assembly, function, and influence on tissue lipid composition. *PLoS Genet*. 2012;8: e1002828. doi:10.1371/journal.pgen.1002828
53. Bereczki E, Bernát G, Csont T, Ferdinandy P, Scheich H, Sántha M. Overexpression of human apolipoprotein B-100 induces severe neurodegeneration in transgenic mice. *J Proteome Res*. 2008;7: 2246–2252. doi:10.1021/pr7006329
- 795 54. Löffler T, Flunkert S, Havas D, Sántha M, Hutter-Paier B, Steyrer E, et al. Impact of ApoB-100 expression on cognition and brain pathology in wild-type and hAPP<sup>Sl</sup> mice.

- Neurobiol Aging. 2013;34: 2379–2388. doi:10.1016/j.neurobiolaging.2013.04.008
55. Caramelli P, Nitrini R, Maranhão R, Lourenço AC, Damasceno MC, Vinagre C, et al. Increased apolipoprotein B serum concentration in Alzheimer's disease. *Acta Neurol Scand*. 1999;100: 61–63. doi:10.1111/j.1600-0404.1999.tb00724.x
- 800 56. Zhang R, Barker L, Pinchev D, Marshall J, Rasamoeliso M, Smith C, et al. Mining biomarkers in human sera using proteomic tools. *Proteomics*. 2004;4: 244–256. doi:10.1002/pmic.200300495
57. López-Otín C, Blasco MA, Partridge L, Serrano M, Kroemer G. The hallmarks of aging. *Cell*. 2013;153: 1194–1217. doi:10.1016/j.cell.2013.05.039
- 805 58. Venegas C, Kumar S, Franklin BS, Dierkes T, Brinkschulte R, Tejera D, et al. Microglia-derived ASC specks cross-seed amyloid- $\beta$  in Alzheimer's disease. *Nature*. 2017;552: 355–361. doi:10.1038/nature25158
59. Crowther DC, Kinghorn KJ, Miranda E, Page R, Curry JA, Duthie FAI, et al. Intra-neuronal A $\beta$ , non-amyloid aggregates and neurodegeneration in a *Drosophila* model of Alzheimer's disease. *Neuroscience*. 2005;132: 123–135. doi:10.1016/j.neuroscience.2004.12.025
- 810 60. Osterwalder T, Yoon KS, White BH, Keshishian H. A conditional tissue-specific transgene expression system using inducible GAL4. *Proc Natl Acad Sci U S A*. 2001;98: 12596–12601. doi:10.1073/pnas.221303298
- 815 61. Li G-Z, Vissers JPC, Silva JC, Golick D, Gorenstein MV, Geromanos SJ. Database searching and accounting of multiplexed precursor and product ion spectra from the data independent analysis of simple and complex peptide mixtures. *Proteomics*. 2009;9: 1696–1719. doi:10.1002/pmic.200800564
- 820 62. Distler U, Kuharev J, Navarro P, Levin Y, Schild H, Tenzer S. Drift time-specific collision energies enable deep-coverage data-independent acquisition proteomics. *Nat Methods*. 2014;11: 167–170. doi:10.1038/nmeth.2767
63. Silva JC, Gorenstein MV, Li G-Z, Vissers JPC, Geromanos SJ. Absolute quantification of proteins by LCMSE: a virtue of parallel MS acquisition. *Mol Cell Proteomics*. 2006;5: 144–156. doi:10.1074/mcp.M500230-MCP200
- 825 64. Bolstad BM, Irizarry RA, Astrand M, Speed TP. A comparison of normalization methods for high density oligonucleotide array data based on variance and bias. *Bioinformatics*. 2003;19: 185–193. doi:10.1093/bioinformatics/19.2.185
65. Eden E, Navon R, Steinfeld I, Lipson D, Yakhini Z. GOrilla: a tool for discovery and visualization of enriched GO terms in ranked gene lists. *BMC Bioinformatics*. 2009;10: 48. doi:10.1186/1471-2105-10-48
- 830 66. Mi H, Muruganujan A, Casagrande JT, Thomas PD. Large-scale gene function analysis with the PANTHER classification system. *Nat Protoc*. 2013;8: 1551–1566. doi:10.1038/nprot.2013.092
67. Oliphant TE. SciPy: Open source scientific tools for Python. *Computing in Science and Engineering*. 2007;9: 10–20.
- 835 68. Oliphant TE. A guide to NumPy [Internet]. Trelgol Publishing USA; 2006. Available: <http://ns.ael.ru/ports/distfiles/numpybook.pdf>

- 840 69. McKinney W, Others. Data structures for statistical computing in python. Proceedings of the 9th Python in Science Conference. Austin, TX; 2010. pp. 51–56. Available: <https://pdfs.semanticscholar.org/f6da/c1c52d3b07c993fe52513b8964f86e8fe381.pdf>
70. Pedregosa F, Varoquaux G, Gramfort A, Michel V, Thirion B, Grisel O, et al. Scikit-learn: Machine Learning in Python. *J Mach Learn Res.* 2011;12: 2825–2830. Available: <http://www.jmlr.org/papers/volume12/pedregosa11a/pedregosa11a.pdf>
- 845 71. Hagberg A, Swart P, S Chult D. Exploring network structure, dynamics, and function using NetworkX [Internet]. Los Alamos National Lab.(LANL), Los Alamos, NM (United States); 2008. Available: <https://www.osti.gov/biblio/960616>
72. Perez F, Granger BE. IPython: A System for Interactive Scientific Computing. *Computing in Science Engineering.* 2007;9: 21–29. doi:10.1109/MCSE.2007.53
- 850 73. Kluyver T, Ragan-Kelley B, Pérez F, Granger BE, Bussonnier M, Frederic J, et al. Jupyter Notebooks-a publishing format for reproducible computational workflows. *ELPUB.* 2016. pp. 87–90. Available: [https://books.google.com/books?hl=en&lr=&id=Lgy3DAAAQBAJ&oi=fnd&pg=PA87&dq=jupyter&ots=N1AZ8RuCbo&sig=s-Q\\_\\_Qm1hHR7bJmgi6x\\_Y8NGCzE](https://books.google.com/books?hl=en&lr=&id=Lgy3DAAAQBAJ&oi=fnd&pg=PA87&dq=jupyter&ots=N1AZ8RuCbo&sig=s-Q__Qm1hHR7bJmgi6x_Y8NGCzE)
- 855 74. Hunter JD. Matplotlib: A 2D Graphics Environment. *Comput Sci Eng. IEEE Computer Society;* 2007;9: 90–95. doi:10.1109/MCSE.2007.55
75. Müller UC, Deller T, Korte M. Not just amyloid: physiological functions of the amyloid precursor protein family. *Nat Rev Neurosci.* 2017;18: 281–298. doi:10.1038/nrn.2017.29
- 860 76. Li Y, Liu T, Peng Y, Yuan C, Guo A. Specific functions of Drosophila amyloid precursor-like protein in the development of nervous system and nonneural tissues. *J Neurobiol.* 2004;61: 343–358. doi:10.1002/neu.20048
77. Torroja L, Chu H, Kotovsky I, White K. Neuronal overexpression of APPL, the Drosophila homologue of the amyloid precursor protein (APP), disrupts axonal transport. *Curr Biol.* 1999;9: 489–492. doi:10.1016/S0960-9822(99)80215-2
- 865 78. Ewald CY, Li C. Understanding the molecular basis of Alzheimer’s disease using a *Caenorhabditis elegans* model system. *Brain Struct Funct.* 2010;214: 263–283. doi:10.1007/s00429-009-0235-3
- 870 79. Baranello RJ, Bharani KL, Padmaraju V, Chopra N, Lahiri DK, Greig NH, et al. Amyloid-beta protein clearance and degradation (ABCD) pathways and their role in Alzheimer’s disease. *Curr Alzheimer Res.* 2015;12: 32–46. doi:10.2174/1567205012666141218140953
